# Supplementary material for: Palladium supported on mixed-metal–organic framework (Co–Mn-MOF-74) for efficient catalytic oxidation of CO
Source: Royal Society of Chemistry journal article supplement (doi:10.1039/d0ra09970h), 2021-01-01
Supplement: d0ra09970h1.pdf [file d0ra09970h1.pdf]

# Palladium Supported on Mixed-Metal Organic Framework (Co-Mn-MOF-74) for Efficient catalytic oxidation of CO

Reda. S. Salama<sup>\*a</sup>, Mohammed A. Mannaa<sup>b</sup>, Hatem M. Altass<sup>c</sup>, Amr Awad Ibrahim<sup>d</sup> Abd El-Rahman S. Khder<sup>\*c, d</sup>

<sup>a</sup> Basic Science Department, Faculty of Engineering, Delta University for Science and Technology, Gamasa, Egypt.

<sup>b</sup> Chemistry Department, Faculty of Science, Amran University, Yemen.

<sup>c</sup> Chemistry Department, Faculty of Applied Science, Umm Al-Qura University, 21955 Makkah, Saudi Arabia

<sup>d</sup> Faculty of Science, Chemistry Department, Mansoura University 35516, Mansoura, Egypt

\*Corresponding author at Basic Science Department, Faculty of Engineering, Delta University for Science and Technology, Gamasa, Egypt.

E-mail address: [reda.salama@deltouniv.edu.eg](mailto:reda.salama@deltouniv.edu.eg), [dr.reda.salama@gmail.com](mailto:dr.reda.salama@gmail.com) (Reda. S. Salama), [mnaam@yahoo.com](mailto:mnaam@yahoo.com) (Mohammed. A. Mannaa) and [askhder2244@yahoo.com](mailto:askhder2244@yahoo.com) (Abd El-Rahman S. Khder)

## †Supplementary information

**Table 1S†:** effect of the weight catalyst on CO conversion over 2 wt. % Pd @ Co<sub>0.5</sub>-Mn<sub>0.5</sub>-MOF-74

| Catalyst                                                              | CO Conversion         |                         |
|-----------------------------------------------------------------------|-----------------------|-------------------------|
|                                                                       | T <sub>50</sub> (50%) | T <sub>100</sub> (100%) |
| 2 wt. % Pd @ Co <sub>0.5</sub> -Mn <sub>0.5</sub> -MOF-74 (0.03 gram) | 206                   | 228                     |
| 2 wt. % Pd @ Co <sub>0.5</sub> -Mn <sub>0.5</sub> -MOF-74 (0.06 gram) | 114                   | 126                     |
| 2 wt. % Pd @ Co <sub>0.5</sub> -Mn <sub>0.5</sub> -MOF-74 (0.1 gram)  | 57                    | 68                      |
| 2 wt. % Pd @ Co <sub>0.5</sub> -Mn <sub>0.5</sub> -MOF-74 (0.13 gram) | 25                    | 66                      |

**Table 2S†:** Comparison of CO oxidation on Pd nanoparticles on various supports

| Catalyst                                                       | T <sub>50%</sub> (°C) | T <sub>100%</sub> (°C) | Reference   |
|----------------------------------------------------------------|-----------------------|------------------------|-------------|
| 1 wt.% Pd @ Cu <sub>3</sub> (BTC) <sub>2</sub>                 | 190                   | 205                    | [29]        |
| 2.7 wt.% Pd @ MIL-53 (Al)                                      | 100                   | 115                    | [31]        |
| 2 wt.% Pd @ SnO <sub>2</sub>                                   | 142                   | 150                    | [60]        |
| 5 wt.% Pd @ Ce-MOF                                             | 77                    | 96                     | [61]        |
| 5 wt.% Pd @ Fe <sub>3</sub> O <sub>4</sub>                     | 200                   | 204                    | [62]        |
| 5 wt.% Pd @ Co <sub>3</sub> O <sub>4</sub>                     | 170                   | 173                    | [62]        |
| 5 wt.% Pd @ Ce <sub>0.8</sub> Hf <sub>0.2</sub> O <sub>2</sub> | 76                    | 171                    | [56]        |
| 2 wt. % Pd @ Co <sub>0.5</sub> -Mn <sub>0.5</sub> -MOF-74      | 57                    | 68                     | Recent Work |
| 5 wt. % Pd @ Co <sub>0.5</sub> -Mn <sub>0.5</sub> -MOF-74      | 50                    | 58                     | Recent Work |

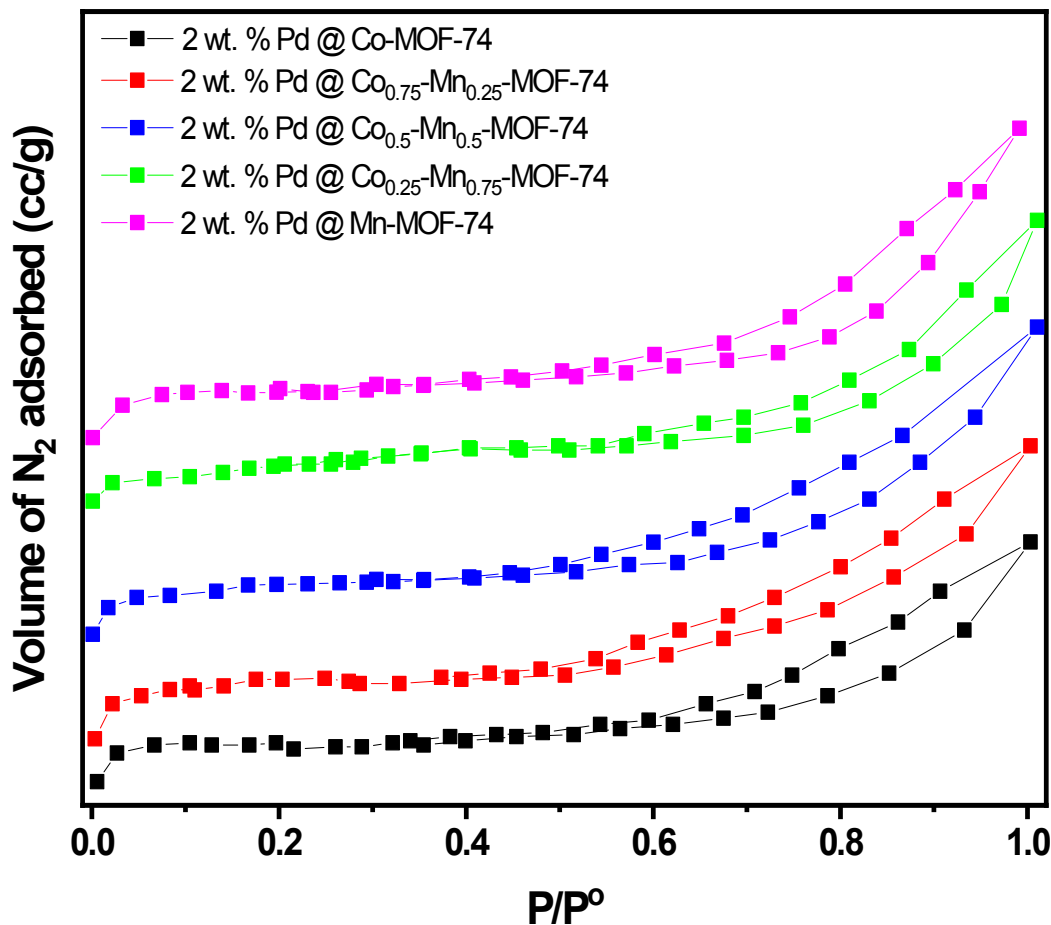

**Fig. 1S†:** Adsorption–desorption isotherms of nitrogen at 196 °C on 2 wt. % Pd loaded on monometallic and bimetallic MOFs.

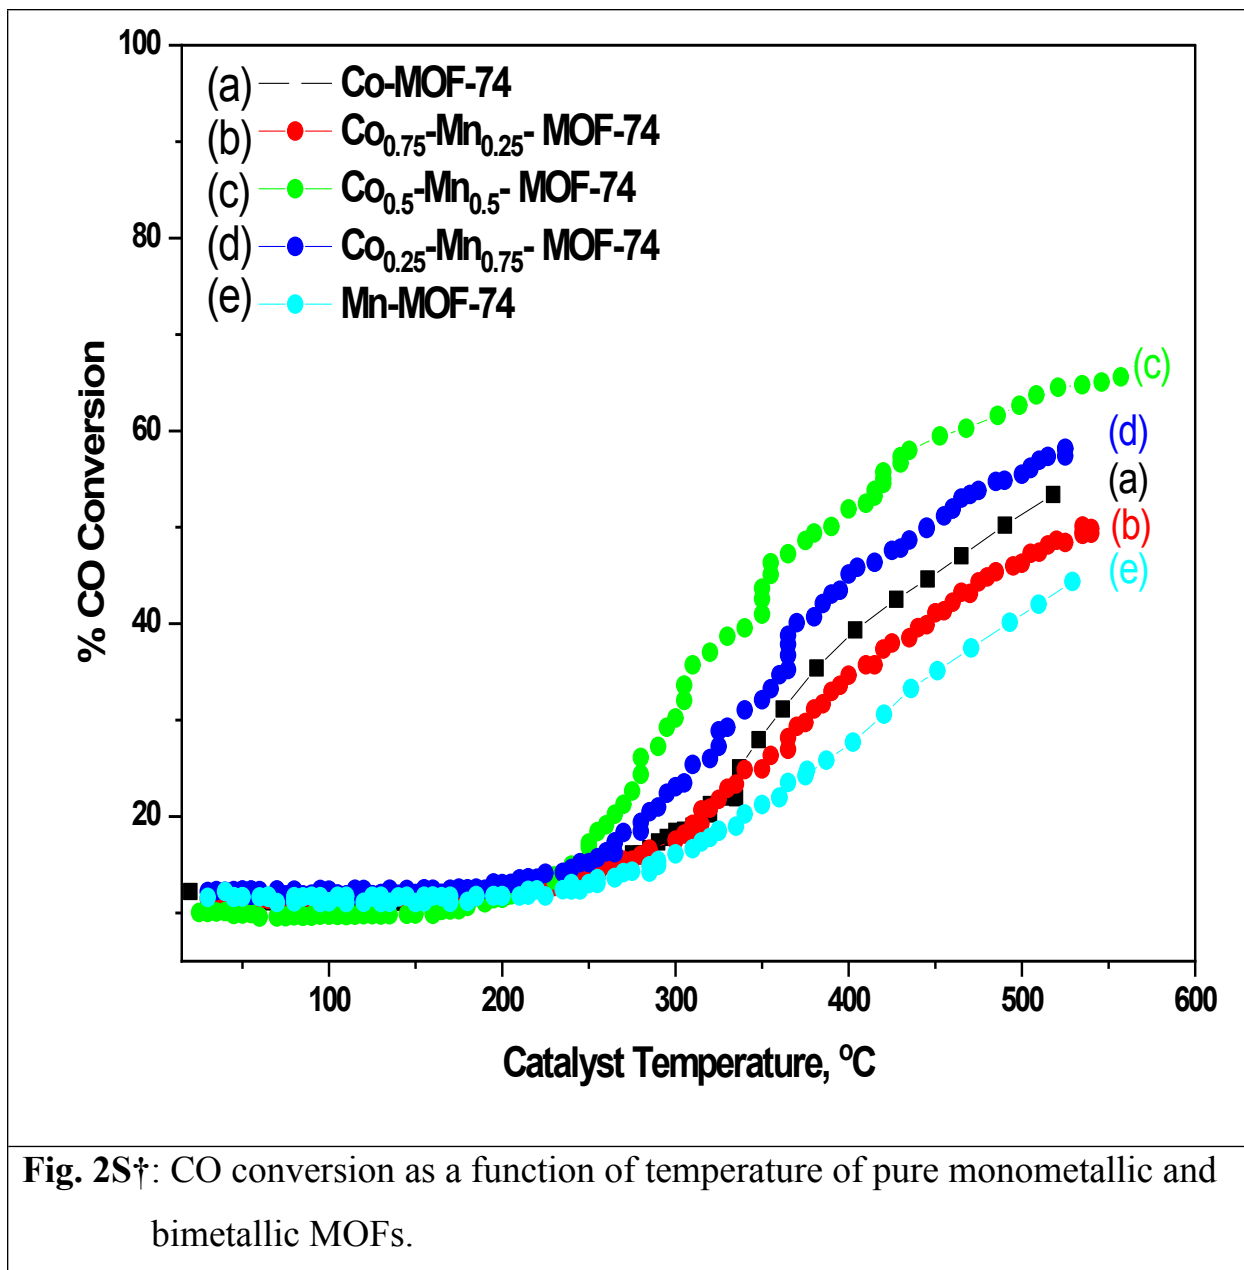

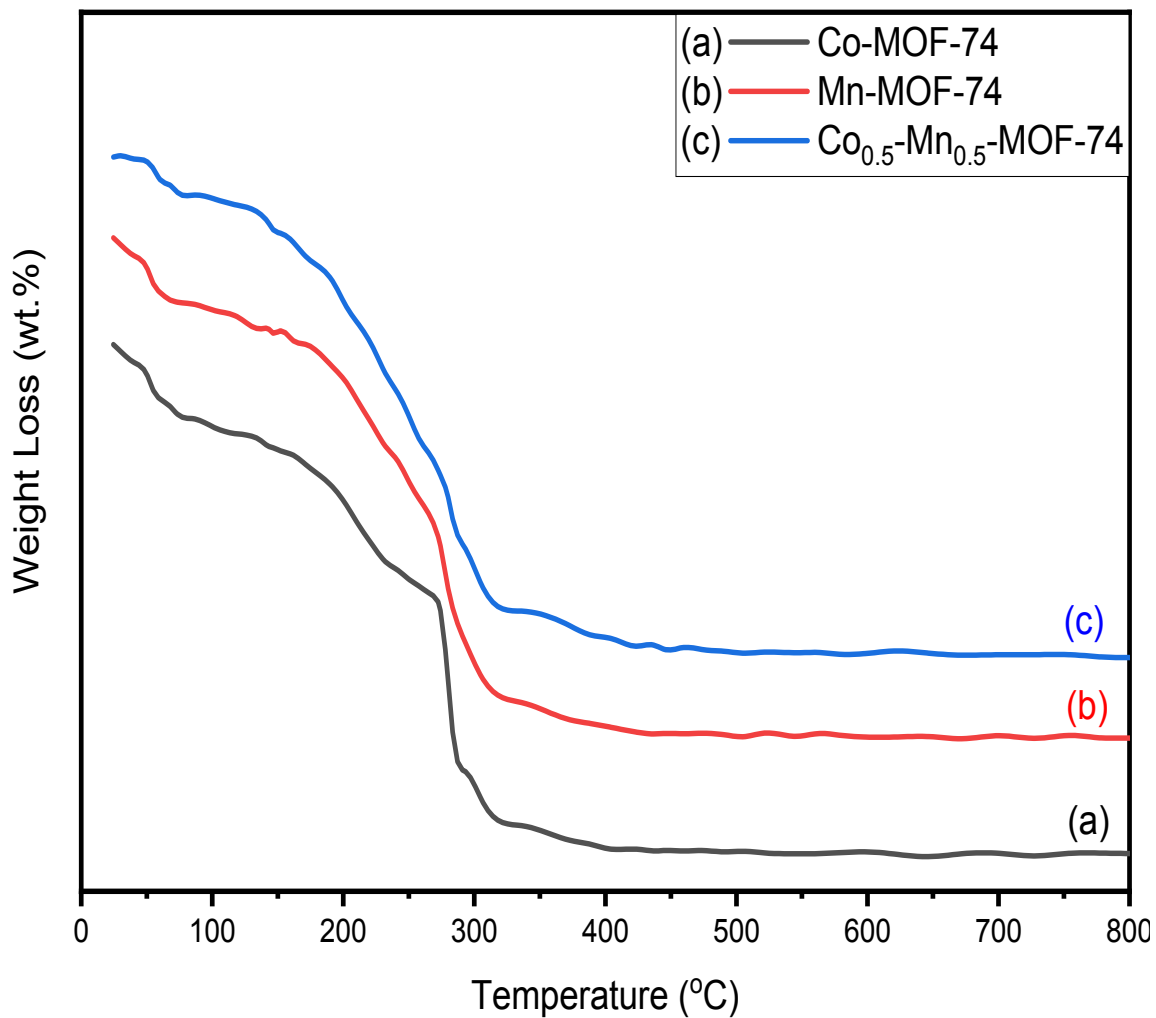

**Fig. 3S†:** TGA curves of (a) Co-MOF-74, (b) Mn-MOF-74 and (c) Co<sub>0.5</sub>Mn<sub>0.5</sub>-MOF-74

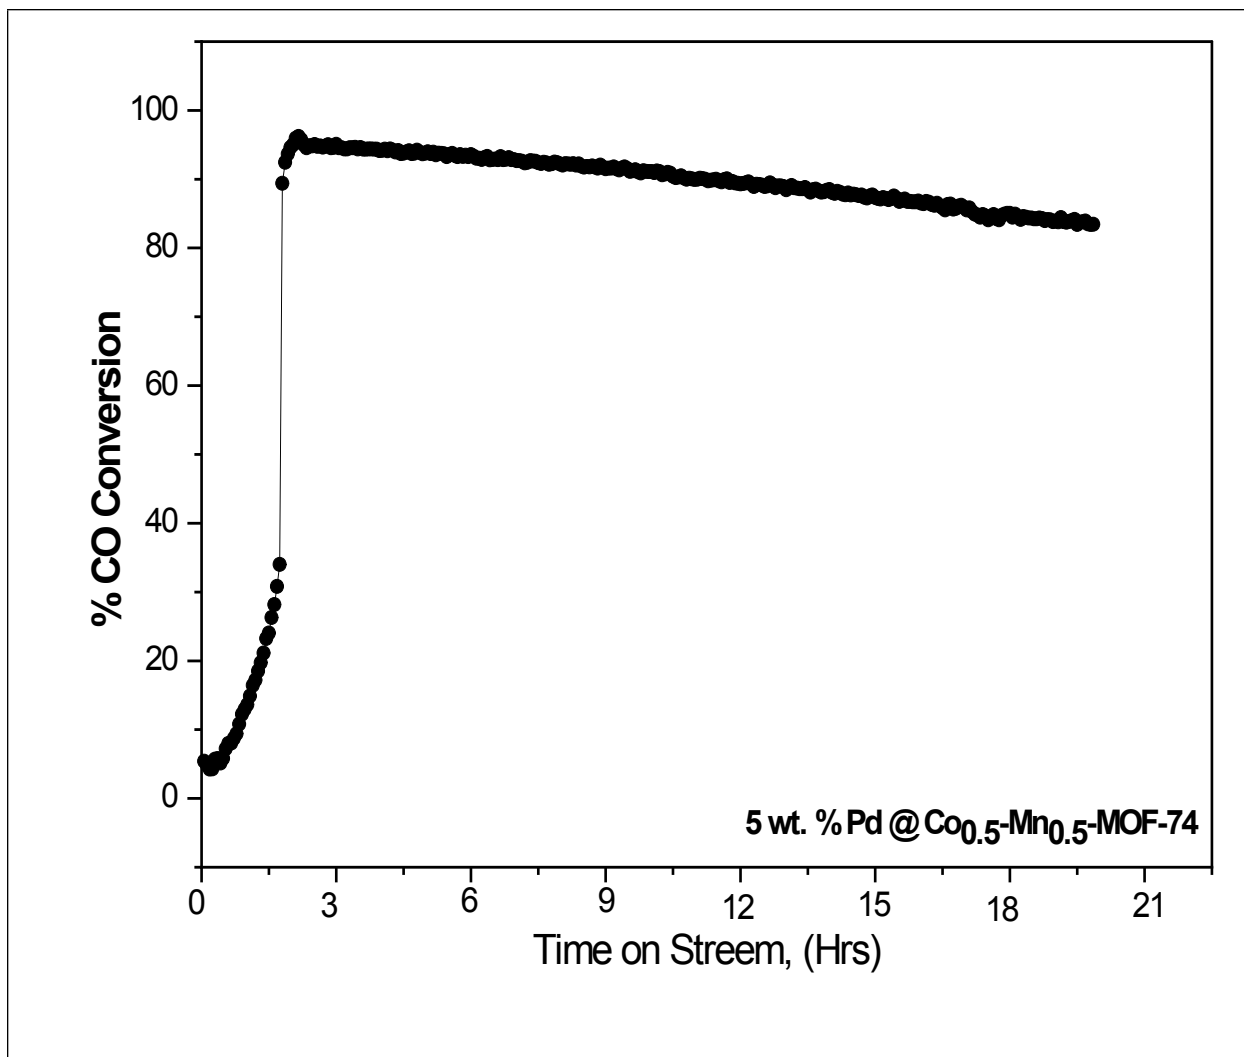

**Fig. 4S†:** Effect of time on stream on the CO catalytic oxidation for 21h 5 wt. % Pd @ Co<sub>0.5</sub>-Mn<sub>0.5</sub>-MOF-74.

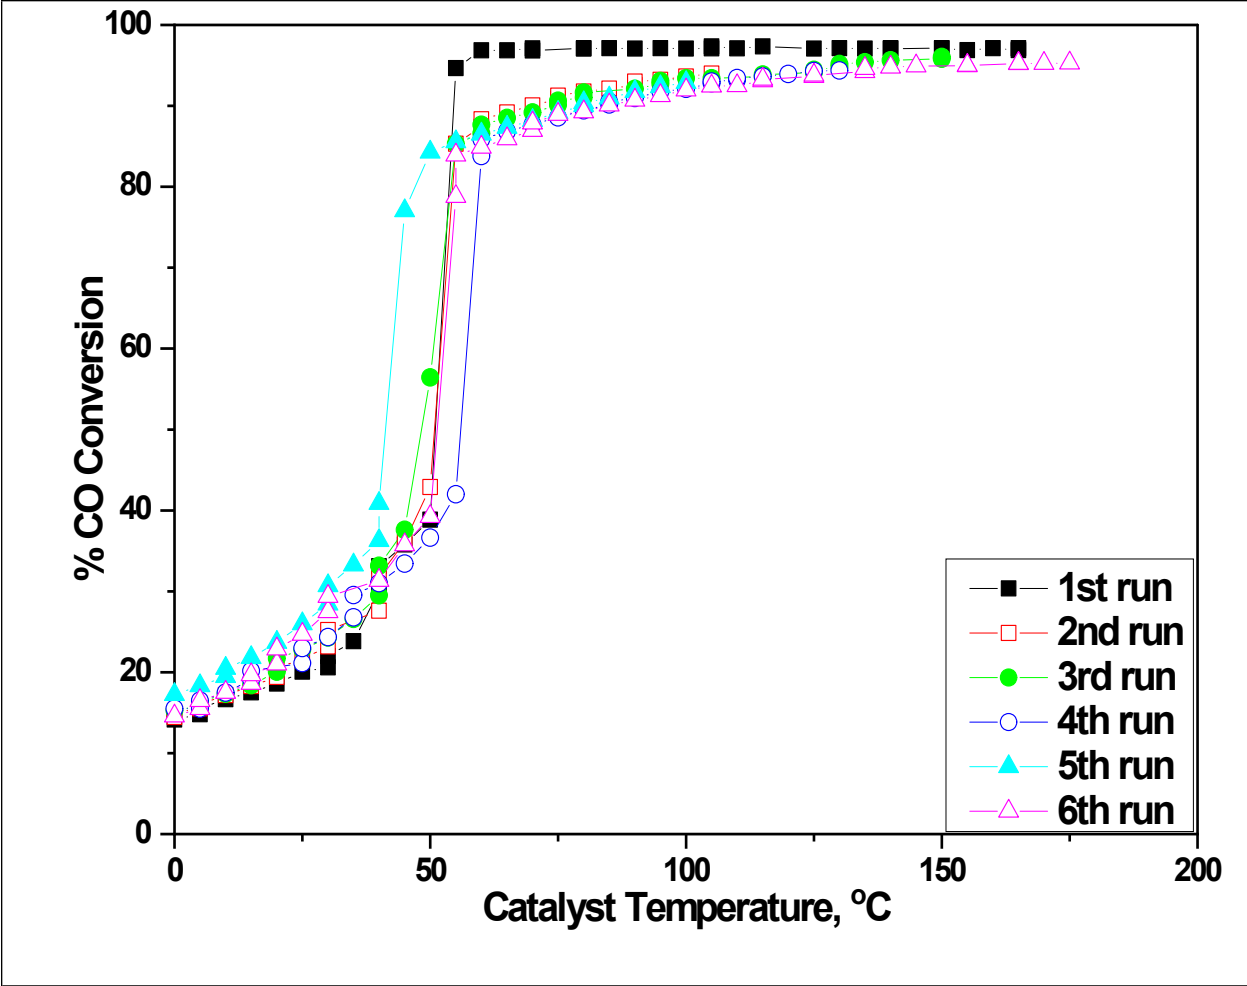

Fig. 5S†: Reusability test for 5 wt. % Pd @ Co<sub>0.5</sub>-Mn<sub>0.5</sub>-MOF-74.
